# Supplementary material
Source: PubMed Central journal article supplement (PMC3243546)
Supplement: supp_M111.313486_jbc.M111.313486-1.pdf [file supp_M111.313486_jbc.M111.313486-1.pdf]

**Figure S1: The *Stp1* mutant is similar to WT for growth in TSB (A), human serum (B) and sialylation of the GBS capsular polysaccharide (C).**  
 (A) Growth of GBS (WT,  $\Delta stp1$ ) in rich media such as TSB (Tryptic Soy Broth) was monitored by measuring the optical density at 600nm (O.D 600nm). Growth of the mutant was not significantly different from WT ( $P=0.8$ ).  
 (B) GBS (WT,  $\Delta stp1$ ) growth in normal human serum was measured for a period of 24 hrs as described previously (1). Overall growth of the  $\Delta stp1$  was not significantly different from WT ( $P=0.17$ )  
 (C) Sialic acid concentrations in capsular polysaccharide isolated from WT GBS and the  $\Delta stp1$  mutant was estimated as described (2). The amount of sialic acid obtained from CPS of WT and the  $\Delta stp1$  mutant was not significantly different ( $P=0.7$ ). NS= not significant.

A

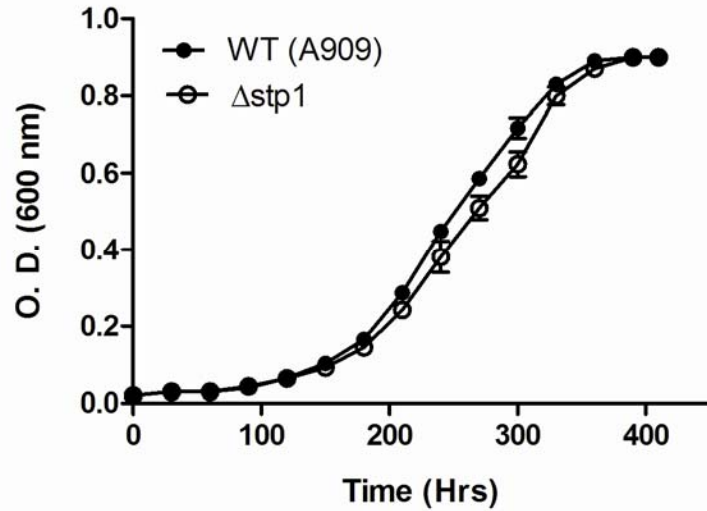

B

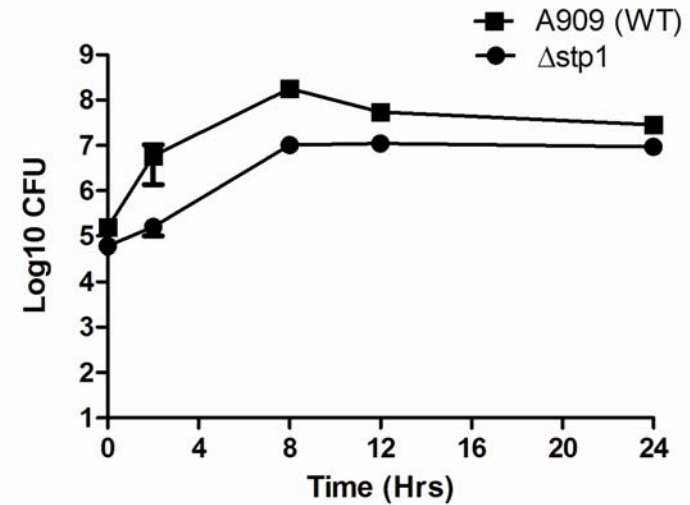

C

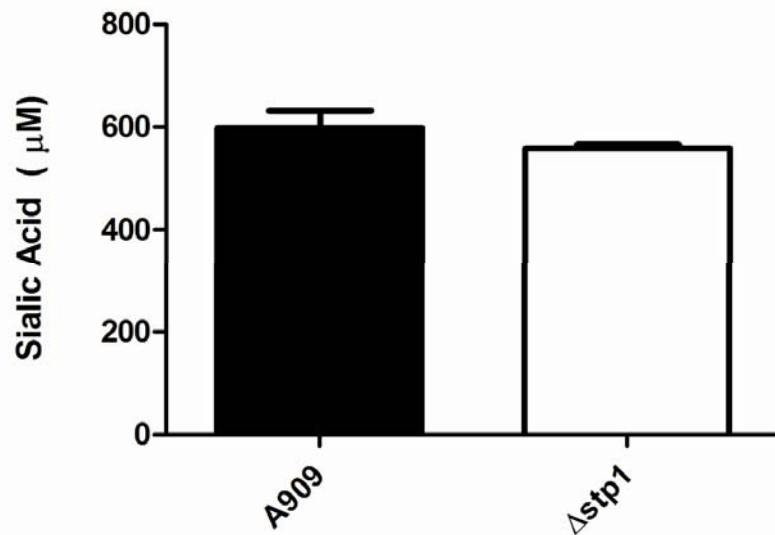

**Figure S2: The  $\Delta stp1$  mutant is proficient for adherence (A) and invasion (B) of human brain microvascular endothelial cells (hBMEC)**

Adherence and Invasion of hBMEC by GBS A909 and the isogenic  $\Delta stp1$  strain were performed at an MOI (multiplicity of infection) of 1 as described (3). Percent adherence was normalized to that of the WT as described (4). Note that the  $\Delta stp1$  strain is similar to the WT for adherence and invasion of hBMEC. NS= not significant.

A

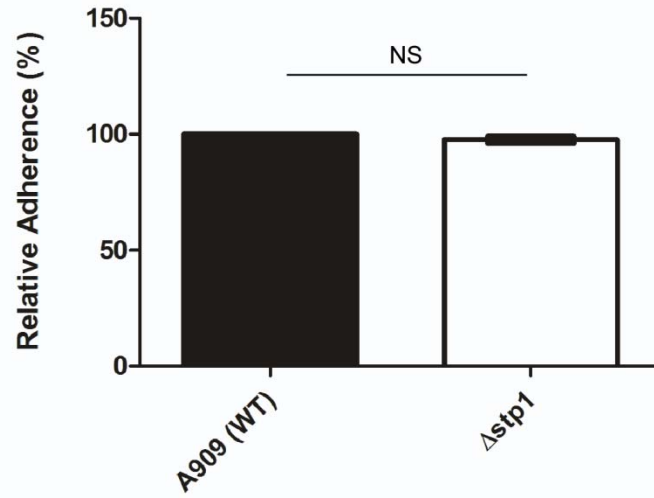

B

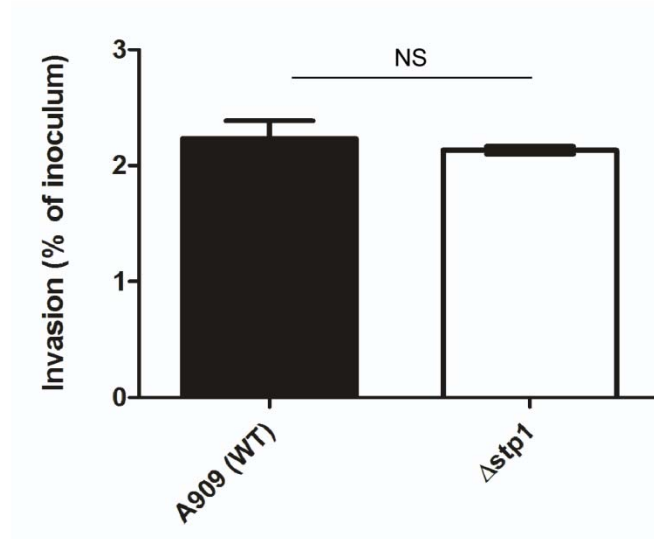

**Figure S3**

**A. Hemolytic activity of GBS  $\Delta stp1$  is lower than  $\Delta stk1$  and  $\Delta stp1\Delta stk1$**

The zone of clearing observed around the colonies on the sheep blood agar plate represents  $\beta$ -H/C activity. Note that hemolytic activity of GBS deficient in expression of *Stk1* ( $\Delta stk1$ ) and both *Stp1* and *Stk1* ( $\Delta stp1\Delta stk1$ ) are similar and lower than WT A909 but greater than  $\Delta stp1$ . The decrease in hemolytic activity in  $\Delta stk1$  and  $\Delta stp1\Delta stk1$  correlated with decreased transcription of the *cylE* gene encoding hemolysin (5). The lack of hemolytic activity observed in  $\Delta stp1$  is not due to decreased *cylE* transcription (see Table 3 of manuscript).

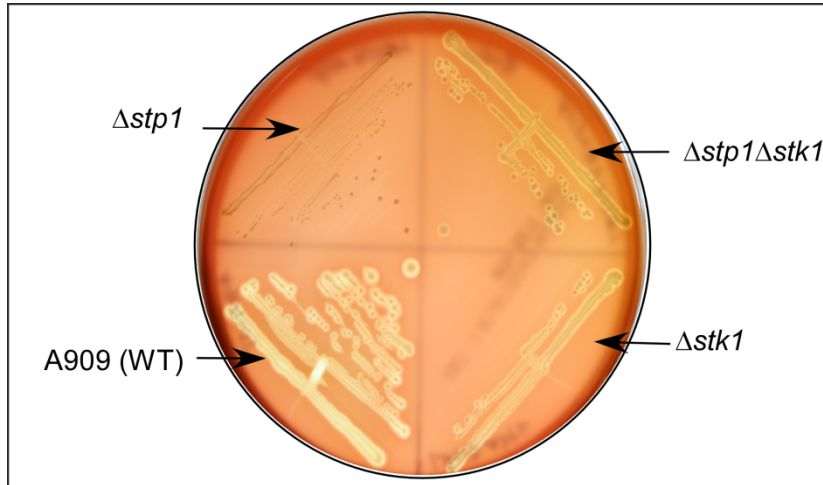

**B. The increase in autolysis observed in GBS  $\Delta stp1$  is not seen in GBS  $\Delta stp1\Delta stk1$  or  $\Delta stk1$ .**

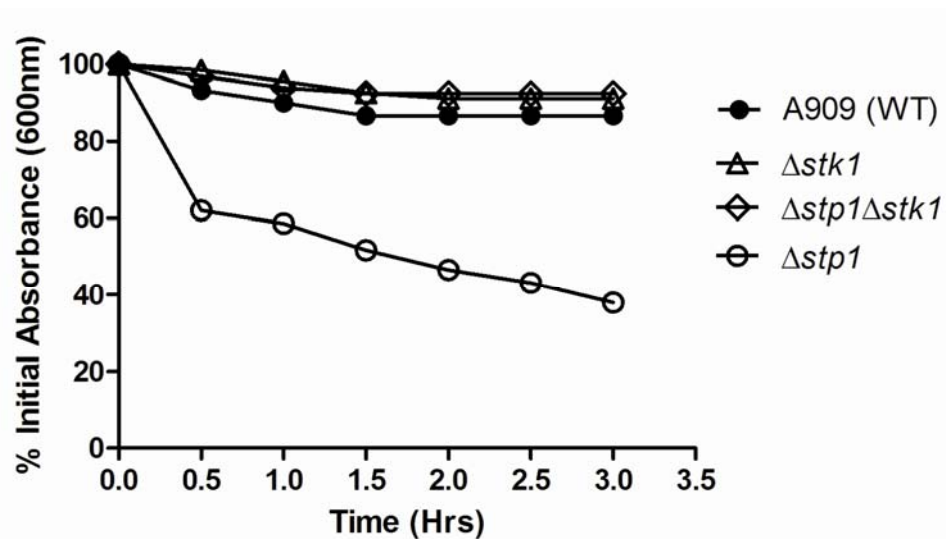

**Table S1. Strains, plasmids and primers**

| Strains                                             | Genotype\phenotype                                                                                                       | Reference  |
|-----------------------------------------------------|--------------------------------------------------------------------------------------------------------------------------|------------|
| <b>Group B Streptococci or <i>S. agalactiae</i></b> |                                                                                                                          |            |
| A909                                                | Wild-type (WT), Serotype Ia                                                                                              | (6)        |
| LR154                                               | $\Delta stp1::\Omega km-2 \backslash Km^R$ , A909                                                                        | (7)        |
| LR128                                               | $\Delta covR::sp \backslash Sp^R$                                                                                        | (5)        |
| LR155                                               | $\Delta covR \Delta stp1 \backslash Km^R$ , $Sp^R$                                                                       | This study |
| LR113                                               | $\Delta stk1::\Omega km-2 \backslash Km^R$ , A909                                                                        | (8)        |
| LR114                                               | $\Delta stp1 \Delta stk1::\Omega km-2 \backslash Km^R$ , A909                                                            | (8)        |
| LR171                                               | $\Delta SAK\_0373/divIVA \text{ domain}::\Omega km-2 \backslash Km^R$                                                    | This study |
| LR172                                               | $\Delta SAK\_0581/ftsZ::\Omega km-2 \backslash Km^R$                                                                     | This study |
| LR173                                               | $\Delta SAK\_0586/divIVA::\Omega km-2 \backslash Km^R$                                                                   | This study |
| <b><i>Escherichia coli</i></b>                      |                                                                                                                          |            |
| MC1061                                              | F' <i>araD139</i> $\Delta(ara-leu)7696 \Delta(lac)X74 galU galK hadR2$ ( $r_k^-$ $m_k^+$ ) <i>mcrB1 rpsL</i> ( $Str^+$ ) | (9)        |
| <b>Plasmids</b>                                     |                                                                                                                          |            |
| pDC123                                              | plasmid vector derived from pJS3, $Cm^R$                                                                                 | (10)       |
| pStp1                                               | pDC123 encoding Stp1                                                                                                     | (8)        |

| <b>Primers</b>       |                                                                |
|----------------------|----------------------------------------------------------------|
| PF3:5'               | 5-CGATCGTCTAGATGCATCAATAAAAACGCCAAAACAAACGTTACTCT<br>GT-3'     |
| PR1+:5'              | 5'-CCAATTCAGTTCCTTGCATGACGATGTCAGTTTCCTCCT -3'                 |
| NEWPF2+:5'           | 5'-AGTGAGGCGGTTTAATGATTCAGATTGGCAAATTATTTGCTG-3'               |
| PR4:5'               | 5'-GCGTATGGTACCCACGGTGACTTTTCCAGCTTAGAGCAGTTGATAAA<br>TCAC -3' |
| PF1:5'               | 5' -TGCAAGGAACAGTGAATTGGAGTTCGTCTTGTTATAATTA -3'               |
| NEWPR2:5'            | 5' -TAAACCGCCTCACTTTCAACAAACAATTCATCCAGTAAAA-3'                |
| SAK_0373 5' XhoI     | 5'-CCATCTCGAGGCCATGTGCTCTATTTGGTG-3'                           |
| SAK_0373 5' + Kan 5' | 5'-CTCCAATTCAGTTCCTTGTCTATTCTCAAACCAGTCA-3'                    |
| Kan 5' + SAK_0373 5' | 5'-TGACTGGTTTGGAGAATAGACAAGGAACAGTGAATTGGAG-3'                 |
| Kan 3' + SAK_0373 3' | 5'-GCATATTTGAGAAATCCTTATGCGGATGTACTTCAGAAAAG-3'                |
| SAK_0373 3' + Kan 3' | 5'-CTTTTCTGAAGTACTCCGCATAAGGATTTCTCAAATATGC-3'                 |
| SAK_0373 3' SpeI     | 5'-CCGTAAGTCAATCAATGGCTTATCAGGG-3'                             |
| SAK_0581 5' XhoI     | 5'-CTCGCTCGAGGAGAAGTTATTCATTGATTCCGC-3'                        |
| SAK_0581 5' + Kan 5' | 5'-CTCCAATTCAGTTCCTTGTGTTTTATTCCTCACTTATTGT-3'                 |
| Kan 5' + SAK_0581 5' | 5'-ACAATAAGTGAGGAATAAAACAAGGAACAGTGAATTGGAG-3'                 |
| Kan 3' + SAK_0581 3' | 5'-GTAAATTCATCATTTTAATTATGCGGATGTACTTCAGAAAAG-3'               |
| SAK_0581 3' + Kan 3' | 5'-CTTTTCTGAAGTACATCCGCATAATTAATGATGAATTTAC-3'                 |
| SAK_0581 3' XbaI     | 5'-CCTGTCTAGAGCATCCTCATACTTACGGGG-3'                           |
| SAK_0586 5' XhoI     | 5'-GGTCCTCGAGCTTATATCTTACTAGCCTATGCC-3'                        |
| SAK_0586 5' + Kan 5' | 5'-CTCCAATTCAGTTCCTTGGTTTTCTCCTTAGTTATGTATC-3'                 |
| Kan 5' + SAK_0586 5' | 5'-GATACATAACTAAGGAGAAAACCAAGGAACAGTGAATTGGAG-3'               |
| Kan 3' + SAK_0586 3' | 5'-AATATTAACCTTGTGTTTTCTTATGCGGATGTACTTCAGAAAAG-3'             |

|                                         |                                                     |
|-----------------------------------------|-----------------------------------------------------|
| SAK_0586 3' + Kan 3'                    | 5'-CTTTTCTGAAGTACATCCGCATAAGAAAAACAAGGTTTTAATATT-3' |
| SAK_0586 3' SacII                       | 5'-GGTTCCGCGGCTGGTCCTACTGTAAACCGC-3'                |
| <b>qRT-PCR primers for select genes</b> |                                                     |
| <i>cylEL</i>                            | 5'-GGAAGTTACCCGATTGAGCA-3'                          |
| <i>cylER</i>                            | 5'-TGCCAGGAGGAGAATAGGAA-3'                          |
| <i>stk1L</i>                            | 5'-GTATTGCGGTAGCGTTTGCT-3'                          |
| <i>stk1R</i>                            | 5'-GCCTGCTCTGGCGATAAATA-3'                          |
| SAK_0652 qRT-F                          | 5'-CTTTGATGGCTATTTTAGGAGC-3'                        |
| SAK_0652 qRT-R                          | 5'-TGGCTCGTGGTAAGTCAATG-3'                          |
| SAK_0653 qRT-F                          | 5'-GACGTTTTGGCGGTGATAGT-3'                          |
| SAK_0653 qRT-R                          | 5'-CAGCGCTAGCGATTTTATCC-3'                          |

**Table S2 (A). *Stk1* expression is similar to the WT in the  $\Delta$ *stp1* mutant**

| <b>Locus</b>           | <b>Gene Expression</b> |                    |
|------------------------|------------------------|--------------------|
|                        | <b>qRT-PCR</b>         | <b>Microarray*</b> |
| <i>stk1</i> (SAK_0389) | 1.26 $\pm$ 0.11        | 1.08 $\pm$ 0.15    |

qRT-PCR was performed as described in *Experimental Procedures*. Gene expression is denoted as fold difference relative to the WT GBS strain A909 and standard deviation is indicated.\* Indicates values from microarray analysis for *stk1* (see Table S5 for genes that showed > or < 2 fold change).

**Table S2 (B). Stp1 regulated genes in GBS serotype Ia strain A909**

| <b>(i): Upregulated genes</b>                         |                                                                                       |                                    |                                 |
|-------------------------------------------------------|---------------------------------------------------------------------------------------|------------------------------------|---------------------------------|
| <b>Locus</b>                                          | <b>Protein description or name</b>                                                    | <b>Microarray<br/><i>Δstp1</i></b> | <b>qRT-PCR<br/><i>Δstp1</i></b> |
| <b>Signal Transduction/Transcriptional regulators</b> |                                                                                       |                                    |                                 |
| SAK_2031                                              | transcriptional regulator Spx                                                         | 6.14                               | 5.1                             |
| SAK_0531                                              | transcriptional regulator, AraC family                                                | 6.02                               |                                 |
| SAK_0008                                              | transcription-repair coupling factor                                                  | 3.11                               |                                 |
| SAK_1660                                              | transcriptional regulator, putative                                                   | 3.00                               |                                 |
| SAK_0075                                              | phosphosugar-binding transcriptional regulator, RpiR family                           | 2.91                               |                                 |
| SAK_1618                                              | 3H domain protein                                                                     | 2.62                               |                                 |
| SAK_2067                                              | response regulator                                                                    | 2.40                               |                                 |
| SAK_0860                                              | PspC domain protein                                                                   | 2.22                               |                                 |
| SAK_2066                                              | sensor histidine kinase, putative                                                     | 2.12                               |                                 |
| <b>Transporters</b>                                   |                                                                                       |                                    |                                 |
| SAK_0565                                              | BioY family protein                                                                   | 21.17                              |                                 |
| SAK_1702                                              | PTS system, sucrose-specific IIABC component                                          | 18.14                              |                                 |
| SAK_1596                                              | hydrophobic amino acid uptake (HAAT) family ABC transporter, permease protein LivM    | 17.22                              |                                 |
| SAK_1597                                              | hydrophobic amino acid uptake (HAAT) family ABC transporter, permease protein LivH    | 14.41                              |                                 |
| SAK_1595                                              | hydrophobic amino acid uptake (HAAT) family ABC transporter, ATP-binding protein LivG | 11.15                              |                                 |
| SAK_0472                                              | BioY family protein                                                                   | 8.41                               |                                 |
| SAK_0523                                              | PTS system IIA domain protein                                                         | 8.18                               |                                 |
| SAK_0530                                              | PTS system, galactitol-specific IIB component, putative                               | 8.04                               |                                 |
| SAK_0398                                              | PTS system, IIA component, lactose/cellobiose family                                  | 6.59                               |                                 |
| SAK_0529                                              | PTS system, galactitol-specific IIC component                                         | 6.17                               |                                 |
| SAK_1044                                              | polar amino acid uptake (PAAT) family ABC transporter, amino acid-binding protein     | 5.42                               |                                 |



|           |                                                                                       |      |       |
|-----------|---------------------------------------------------------------------------------------|------|-------|
| SAK_0256* | peptide/opine/nickel uptake (PepT) family ABC transporter, ATP-binding protein        | 3.40 | 3.5   |
| SAK_0855  | permease, putative                                                                    | 2.59 |       |
| SAK_1510  | D-Serine/D-alanine/glycine:H <sup>+</sup> symporter                                   | 2.54 |       |
| SAK_0354  | PTS system, IIBC component                                                            | 2.53 |       |
| SAK_0254* | peptide/opine/nickel uptake (PepT) family ABC transporter, permease protein           | 2.50 |       |
| SAK_1083  | phosphate ABC transporter, ATP-binding protein PstB, putative                         | 2.50 |       |
| SAK_1728  | CvpA family protein                                                                   | 2.46 |       |
| SAK_0593  | polar amino acid uptake (PAAT) family ABC transporter, ATP-binding protein            | 2.44 |       |
| SAK_1466  | polar amino acid uptake (PAAT) family ABC transporter, amino acid-binding protein     | 2.43 |       |
| SAK_0207  | oligopeptide ABC transporter, permease protein                                        | 2.39 |       |
| SAK_0173  | ABC transporter, ATP-binding protein                                                  | 2.36 |       |
| SAK_1085  | phosphate ABC transporter, permease protein PtsA                                      | 2.25 |       |
| SAK_1082  | phosphate transport system regulatory protein PhoU                                    | 2.24 |       |
| SAK_0940  | probable proton-coupled thiamine transporter YuaJ                                     | 2.17 |       |
| SAK_1989  | azaleucine resistance protein AzID                                                    | 2.16 |       |
| SAK_1086  | phosphate ABC transporter, permease protein PstC                                      | 2.06 |       |
| SAK_1426* | ferrichrome ABC transporter, ferrichrome-binding protein                              | 2.05 | 3.0   |
| SAK_0259  | PRD domain/PTS system IIA domain protein                                              | 2.05 |       |
| SAK_1646  | nickel/cobalt uptake transporter (NiCoT) family ABC transporter, permease protein     | 2.04 |       |
| SAK_1593  | CBS domain protein                                                                    | 7.99 | 17.94 |
| SAK_1594  | hydrophobic amino acid uptake (HAAT) family ABC transporter, ATP-binding protein LivF | 7.98 |       |
| SAK_1895  | PTS system, IIA component, putative                                                   | 2.91 |       |
| SAK_0208  | oligopeptide ABC transporter, permease protein OppC, putative                         | 2.90 |       |
| SAK_1575  | branched chain amino acid:H <sup>+</sup> symporter                                    | 5.80 |       |
| SAK_0399  | PTS system, IIB component, lactose/cellobiose family                                  | 7.77 |       |
| SAK_0255* | peptide/opine/nickel uptake (PepT) family ABC transporter, ATP-binding protein        | 2.77 |       |
| SAK_0439  | purine transporter, AzgA family                                                       | 2.77 |       |

|                                                                 |                                                                                   |       |      |
|-----------------------------------------------------------------|-----------------------------------------------------------------------------------|-------|------|
| SAK_0664                                                        | calcium-transporting ATPase, P-type (transporting), HAD superfamily, subfamily IC | 3.70  |      |
| SAK_0915                                                        | PTS system, beta-glucoside-specific IIABC component                               | 3.69  |      |
| SAK_0400                                                        | PTS system, IIC component, lactose/cellobiose family                              | 6.63  |      |
| SAK_0210                                                        | oligopeptide ABC transporter, ATP-binding protein                                 | 3.62  |      |
| SAK_1392                                                        | ABC transporter, permease protein, putative                                       | 2.62  |      |
| SAK_0534*                                                       | ABC transporter, permease protein                                                 | 2.61  |      |
| SAK_0209                                                        | oligopeptide ABC transporter, ATP-binding protein                                 | 3.60  |      |
| <b>Protein/peptide/amino acid and DNA synthesis/degradation</b> |                                                                                   |       |      |
| SAK_0064                                                        | zoocin A, metallopeptidase                                                        | 10.50 |      |
| SAK_0814                                                        | DNA-entry nuclease, putative                                                      | 6.56  |      |
| SAK_1523                                                        | CAAX amino terminal protease family protein                                       | 6.16  |      |
| SAK_2120                                                        | B3/4 domain protein                                                               | 4.58  |      |
| SAK_0007                                                        | peptidyl-tRNA hydrolase                                                           | 3.59  |      |
| SAK_1386                                                        | 16S rRNA-processing protein                                                       | 2.91  |      |
| SAK_0284                                                        | replication initiation factor family protein                                      | 2.79  |      |
| SAK_0606                                                        | DNA-binding protein HU                                                            | 2.78  |      |
| SAK_1815                                                        | 50S ribosomal protein L34                                                         | 2.56  |      |
| SAK_0054                                                        | CAAX amino terminal protease family protein                                       | 2.37  |      |
| SAK_0718                                                        | 23S rRNA (uracil-5-)-methyltransferase Ruma                                       | 2.17  |      |
| SAK_0570                                                        | endonuclease III                                                                  | 2.13  |      |
| SAK_1800                                                        | rRNA (guanine-N1-) methyltransferase (Mycinamicin-resistance protein)             | 2.03  |      |
| <b>Cell envelope</b>                                            |                                                                                   |       |      |
| SAK_2106*                                                       | LysM domain protein                                                               | 7.60  | 17.8 |
| SAK_2105                                                        | transglycosylase-like domain protein                                              | 4.32  |      |
| SAK_0360                                                        | phospho-N-acetylmuramoyl-pentapeptide-transferase                                 | 3.56  |      |
| SAK_0250                                                        | LrgA family protein                                                               | 3.07  |      |
| SAK_1206                                                        | polysaccharide deacetylase family protein                                         | 2.63  |      |
| SAK_0886                                                        | cell division protein, FtsW/RodA/SpoVE family                                     | 2.40  |      |
| SAK_1445                                                        | glycosyl transferase, group 1 family protein                                      | 2.38  |      |
| SAK_0358                                                        | cell division protein FtsL, putative                                              | 2.32  |      |
| SAK_0780                                                        | Cna B-type domain protein                                                         | 2.11  |      |
| SAK_0782                                                        | Cna protein B-type domain                                                         | 2.08  |      |

| <b>Metabolic functions</b>     |                                                                    |       |      |
|--------------------------------|--------------------------------------------------------------------|-------|------|
| SAK_0566                       | biotin synthetase                                                  | 14.67 |      |
| SAK_1171                       | xanthine phosphoribosyltransferase                                 | 12.91 |      |
| SAK_1701                       | fructokinase                                                       | 11.39 |      |
| SAK_0568                       | acetyl-CoA acetyltransferase family protein                        | 9.37  |      |
| SAK_1170                       | xanthine permease                                                  | 6.95  |      |
| SAK_0527                       | rhamnulose-1-phosphate aldolase                                    | 3.75  |      |
| SAK_1110                       | carbon starvation protein CstA                                     | 3.74  |      |
| SAK_0539                       | aldose 1-epimerase, interruption-N                                 | 3.66  |      |
| SAK_0538                       | UDP-glucose 4-epimerase                                            | 3.48  |      |
| SAK_0401                       | formate acetyltransferase 2                                        | 3.26  |      |
| SAK_0402                       | fructose-6-phosphate aldolase                                      | 3.23  |      |
| SAK_0537                       | galactose-1-phosphate uridylyltransferase                          | 2.95  |      |
| SAK_1672                       | isochorismatase family protein                                     | 2.88  |      |
| SAK_0198                       | glycosyl transferase family protein                                | 2.83  |      |
| SAK_1673                       | HD domain protein                                                  | 2.81  |      |
| SAK_0187*                      | isoprenylcysteine carboxyl methyltransferase (ICMT) family protein | 2.60  |      |
| SAK_1674                       | nicotinic acid mononucleotide adenylyltransferase                  | 2.56  |      |
| SAK_1662                       | dihydroxyacetone kinase DAK1 domain protein                        | 2.50  |      |
| SAK_1663                       | dihydroxyacetone kinase DAK2 domain protein                        | 2.44  |      |
| SAK_1703                       | sucrose-6-phosphate hydrolase                                      | 2.28  |      |
| SAK_0345                       | glycerol kinase                                                    | 2.20  |      |
| SAK_1057                       | glyoxylase family protein                                          | 2.11  |      |
| <b>Mobile genetic elements</b> |                                                                    |       |      |
| SAK_0695                       | ISSag6, transposase orfA                                           | 2.04  |      |
| <b>Autolysis</b>               |                                                                    |       |      |
| SAK_0652                       | prophage LambdaSa03, holin, phi LC3 family                         | 50.17 | 718  |
| SAK_0653                       | prophage LambdaSa03, peptidoglycan endolysin                       | 31.00 | 370  |
| <b>Unknown function</b>        |                                                                    |       |      |
| SAK_0651                       | hypothetical protein                                               | 32.67 |      |
| SAK_1522                       | hypothetical protein                                               | 8.47  |      |
| SAK_0440*                      | conserved hypothetical protein TIGR00150                           | 8.07  | 10.2 |

|          |                                           |      |  |
|----------|-------------------------------------------|------|--|
| SAK_0567 | hypothetical protein                      | 7.59 |  |
| SAK_0569 | hypothetical protein                      | 7.39 |  |
| SAK_0856 | hypothetical protein                      | 3.76 |  |
| SAK_0372 | hypothetical protein                      | 3.43 |  |
| SAK_1599 | hypothetical protein                      | 3.19 |  |
| SAK_0443 | hypothetical protein                      | 3.03 |  |
| SAK_0854 | hypothetical protein                      | 2.85 |  |
| SAK_0605 | hypothetical protein                      | 2.85 |  |
| SAK_2089 | prophage Sa05, BRO domain protein         | 2.84 |  |
| SAK_1664 | hypothetical protein                      | 2.82 |  |
| SAK_0283 | hypothetical protein                      | 2.79 |  |
| SAK_2038 | hypothetical protein                      | 2.71 |  |
| SAK_1012 | hypothetical protein                      | 2.70 |  |
| SAK_0344 | hypothetical protein                      | 2.55 |  |
| SAK_0762 | prophage LambdaSa04, LysM domain protein  | 2.50 |  |
| SAK_2073 | prophage Sa05, membrane protein, putative | 2.49 |  |
| SAK_2130 | hypothetical protein                      | 2.47 |  |
| SAK_1016 | integral membrane protein TIGR01906       | 2.44 |  |
| SAK_1533 | hypothetical protein                      | 2.37 |  |
| SAK_1675 | conserved hypothetical protein TIGR00253  | 2.35 |  |
| SAK_1671 | iojap-related protein                     | 2.34 |  |
| SAK_2072 | hypothetical protein                      | 2.30 |  |
| SAK_1729 | hypothetical protein                      | 2.25 |  |
| SAK_1058 | hypothetical protein                      | 2.18 |  |
| SAK_0990 | hypothetical protein                      | 2.15 |  |
| SAK_1640 | hypothetical protein                      | 2.10 |  |
| SAK_0232 | hypothetical protein                      | 2.10 |  |

| <b>(ii): Downregulated genes</b>                      |                                                                             |                                    |                                 |
|-------------------------------------------------------|-----------------------------------------------------------------------------|------------------------------------|---------------------------------|
| <b>Locus</b>                                          | <b>Protein description or name</b>                                          | <b>Microarray<br/><i>Δstp1</i></b> | <b>qRT-PCR<br/><i>Δstp1</i></b> |
| <b>Pathogenesis</b>                                   |                                                                             |                                    |                                 |
| SAK_0517                                              | C protein alpha-antigen                                                     | 0.41                               |                                 |
| SAK_0955*                                             | fibrinogen-binding protein, FbsB                                            | 0.16                               | 0.1                             |
| SAK_1142*                                             | fibrinogen-binding protein, FbsA                                            | 0.13                               |                                 |
| <b>Signal Transduction/Transcriptional regulators</b> |                                                                             |                                    |                                 |
| SAK_0279                                              | DNA-binding protein                                                         | 0.49                               |                                 |
| SAK_1220                                              | transcriptional regulator, GntR family/TrkA domain protein                  | 0.46                               |                                 |
| SAK_2012                                              | transcriptional regulator, GntR family                                      | 0.43                               |                                 |
| SAK_0381                                              | DNA-binding response regulator, LuxR family                                 | 0.35                               |                                 |
| SAK_1397                                              | pyrimidine regulatory protein PyrR                                          | 0.35                               |                                 |
| SAK_1828                                              | sugar-binding transcriptional regulator, LacI family                        | 0.30                               |                                 |
| SAK_0928                                              | competence protein CoiA, putative                                           | 0.27                               |                                 |
| SAK_0380*                                             | sensor histidine kinase                                                     | 0.25                               |                                 |
| SAK_1363                                              | transcriptional regulator, MarR family                                      | 0.17                               |                                 |
| SAK_0388                                              | serine/threonine protein phosphatase Stp1                                   | 0.0027                             |                                 |
| <b>Secretion systems/Transporters</b>                 |                                                                             |                                    |                                 |
| SAK_1336                                              | ATP-dependent Clp protease, ATP-binding subunit ClpL                        | 0.43                               |                                 |
| SAK_1361                                              | efflux ABC transporter, permease/ATP-binding protein                        | 0.40                               |                                 |
| SAK_1396                                              | carbamoyl-phosphate synthase small subunit                                  | 0.34                               |                                 |
| SAK_1395                                              | carbamoyl-phosphate synthase, large subunit, putative                       | 0.30                               |                                 |
| SAK_1554                                              | metal ABC transporter, permease protein                                     | 0.29                               |                                 |
| SAK_1817                                              | glycine betaine/proline ABC transporter, permease/substrate-binding protein | 0.29                               |                                 |
| SAK_1818                                              | glycine betaine/proline ABC transporter, ATP-binding protein                | 0.28                               |                                 |
| SAK_1362                                              | efflux ABC transporter, permease/ATP-binding                                | 0.25                               |                                 |

|                            |                                                                  |      |  |
|----------------------------|------------------------------------------------------------------|------|--|
|                            | protein                                                          |      |  |
| SAK_1716                   | drug:H <sup>+</sup> antiporter-2 (DHA2) family protein           | 0.24 |  |
| SAK_1555                   | metal ABC transporter, ATP-binding protein                       | 0.23 |  |
| SAK_0378                   | ABC transporter, ATP-binding protein                             | 0.20 |  |
| SAK_1556                   | metal ABC transporter, metal-binding lipoprotein                 | 0.15 |  |
| SAK_1656                   | amino acid ABC transporter, amino acid-binding protein, putative | 0.14 |  |
| SAK_1996                   | major facilitator family protein                                 | 0.12 |  |
| SAK_1858                   | peptidase, U61 (muramoyl-tetrapeptide carboxypeptidase) family   | 0.50 |  |
| SAK_1222                   | CsbD family protein                                              | 0.41 |  |
| SAK_1223                   | alkaline shock protein 23, putative                              | 0.40 |  |
| SAK_0774                   | chaperone protein HslO, putative                                 | 0.39 |  |
| SAK_1221                   | alkaline shock protein 23, putative                              | 0.39 |  |
| SAK_0150                   | tRNA pseudouridine synthase A                                    | 0.37 |  |
| SAK_2014                   | co-chaperonin GroES                                              | 0.37 |  |
| SAK_0804                   | peptidase, S8 (subtilisin) family                                | 0.15 |  |
| <b>Cell envelope</b>       |                                                                  |      |  |
| SAK_1234                   | LrgB family protein                                              | 0.43 |  |
| SAK_1737                   | beta-lactamase, putative                                         | 0.42 |  |
| SAK_0948                   | polysaccharide deacetylase family protein                        | 0.41 |  |
| SAK_1233                   | LrgA family protein                                              | 0.37 |  |
| SAK_0066                   | N-acetylmannosamine-6-phosphate 2-epimerase                      | 0.37 |  |
| SAK_1655                   | lipoprotein, NLPA family                                         | 0.36 |  |
| SAK_1226                   | transglycosylase associated protein                              | 0.34 |  |
| SAK_0338                   | N-acetylglucosamine-6-phosphate deacetylase                      | 0.31 |  |
| SAK_1227                   | transglycosylase associated protein                              | 0.22 |  |
| SAK_1997                   | patatin-like phospholipase family protein                        | 0.17 |  |
| SAK_1570*                  | glycosyl transferase, group 2 family protein                     | 0.15 |  |
| <b>Metabolic functions</b> |                                                                  |      |  |
| SAK_0058                   | phosphoribosylformylglycinamide synthase                         | 0.38 |  |
| SAK_0059                   | amidophosphoribosyltransferase                                   | 0.41 |  |
| SAK_0060                   | phosphoribosylaminoimidazole synthetase                          | 0.47 |  |
| SAK_0151                   | phosphomethylpyrimidine kinase                                   | 0.44 |  |
| SAK_0328                   | acetyltransferase, GNAT family                                   | 0.43 |  |

|                         |                                                                  |      |     |
|-------------------------|------------------------------------------------------------------|------|-----|
| SAK_0496                | acetyltransferase, GNAT family                                   | 0.31 |     |
| SAK_0657                | dihydroorotate dehydrogenase                                     | 0.15 |     |
| SAK_0924                | glucosamine-6-phosphate isomerase                                | 0.25 |     |
| SAK_0925                | glutathione S-transferase domain protein                         | 0.15 |     |
| SAK_1132                | carbamoyl-phosphate synthase large subunit                       | 0.12 |     |
| SAK_1133                | carbamoyl-phosphate synthase small subunit                       | 0.07 |     |
| SAK_1134                | aspartate carbamoyltransferase catalytic subunit                 | 0.10 |     |
| SAK_1135                | dihydroorotase                                                   | 0.15 |     |
| SAK_1136                | orotate phosphoribosyltransferase                                | 0.11 |     |
| SAK_1137                | orotidine 5'-phosphate decarboxylase                             | 0.18 |     |
| SAK_1141*               | aspartate-semialdehyde dehydrogenase                             | 0.25 |     |
| SAK_1230                | uracil permease                                                  | 0.25 |     |
| SAK_1505                | RNA pseudouridine synthase family protein                        | 0.37 |     |
| SAK_1584                | D-3-phosphoglycerate dehydrogenase, putative                     | 0.20 |     |
| SAK_1585                | acetyltransferase, GNAT family                                   | 0.18 |     |
| SAK_1651                | alcohol dehydrogenase, zinc-containing                           | 0.43 |     |
| SAK_1657                | glutamine amidotransferase class I domain protein                | 0.17 |     |
| SAK_2010                | concentrative nucleoside transporter (CNT) family protein        | 0.44 |     |
| SAK_2011                | uridine phosphorylase                                            | 0.24 |     |
| SAK_2022                | acetyltransferase, GNAT family                                   | 0.30 |     |
| SAK_2023                | oxidoreductase, Gfo/Idh/MocA family                              | 0.40 |     |
| SAK_2025                | anaerobic ribonucleoside triphosphate reductase                  | 0.41 |     |
| <b>Unknown function</b> |                                                                  |      |     |
| SAK_1904                | hypothetical protein                                             | 0.50 |     |
| SAK_1738                | hypothetical protein                                             | 0.48 |     |
| SAK_1126                | hypothetical protein                                             | 0.47 |     |
| SAK_1808*               | hypothetical protein                                             | 0.46 | 0.3 |
| SAK_0839*               | hypothetical protein                                             | 0.46 |     |
| SAK_0152                | hypothetical protein                                             | 0.46 |     |
| SAK_2094                | prophage Sa05, site-specific recombinase, phage integrase family | 0.45 |     |
| SAK_1807*               | hypothetical protein                                             | 0.45 |     |
| SAK_0759                | prophage LambdaSa04, minor structural protein, putative          | 0.44 |     |
| SAK_0678                | hypothetical protein                                             | 0.44 |     |

|           |                                                                      |      |     |
|-----------|----------------------------------------------------------------------|------|-----|
| SAK_1216  | hypothetical protein                                                 | 0.41 |     |
| SAK_1224  | hypothetical protein                                                 | 0.41 |     |
| SAK_0729  | hypothetical protein                                                 | 0.38 |     |
| SAK_0495  | hypothetical protein                                                 | 0.37 |     |
| SAK_1129  | hypothetical protein                                                 | 0.37 |     |
| SAK_0589  | hydrolase, NUDIX family                                              | 0.36 |     |
| SAK_1128  | hypothetical protein                                                 | 0.34 |     |
| SAK_1982  | rhodanese-like domain protein                                        | 0.34 |     |
| SAK_0756  | prophage LambdaSa04, tail tape measure protein, TP901 family         | 0.33 |     |
| SAK_0748  | prophage LambdaSa04, major capsid protein, HK97 family               | 0.32 |     |
| SAK_0758  | prophage LambdaSa04, minor structural protein                        | 0.32 |     |
| SAK_0757  | prophage LambdaSa04, tail protein, putative                          | 0.30 |     |
| SAK_0755  | hypothetical protein                                                 | 0.30 |     |
| SAK_0656  | hypothetical protein                                                 | 0.29 |     |
| SAK_0730  | prophage LambdaSa04, DNA primase, P4 family                          | 0.29 |     |
| SAK_2093  | hypothetical protein                                                 | 0.27 |     |
| SAK_2024  | hypothetical protein                                                 | 0.27 |     |
| SAK_2092  | hypothetical protein                                                 | 0.25 |     |
| SAK_0742  | prophage LambdaSa04, terminase, large subunit                        | 0.24 |     |
| SAK_2091  | prophage Sa05, DNA-binding protein                                   | 0.23 |     |
| SAK_0752  | hypothetical protein                                                 | 0.21 |     |
| SAK_0746  | prophage LambdaSa04, portal protein, HK97 family                     | 0.21 |     |
| SAK_0628* | hypothetical protein                                                 | 0.20 |     |
| SAK_0740  | hypothetical protein                                                 | 0.19 |     |
| SAK_0739  | prophage LambdaSa04, methyltransferase, C-5 cytosine-specific family | 0.19 |     |
| SAK_0956* | hypothetical protein                                                 | 0.18 |     |
| SAK_0379* | hypothetical protein                                                 | 0.18 |     |
| SAK_0750  | prophage LambdaSa04, head-tail adaptor, putative                     | 0.18 |     |
| SAK_0738  | prophage LambdaSa04, DNA methylase                                   | 0.18 |     |
| SAK_0741  | prophage LambdaSa04, terminase, small subunit, P27 family            | 0.17 |     |
| SAK_1571* | hypothetical protein                                                 | 0.16 | 0.1 |
| SAK_0627* | hypothetical protein                                                 | 0.16 |     |
| SAK_1573* | hypothetical protein                                                 | 0.15 |     |



|           |                                                               |      |  |
|-----------|---------------------------------------------------------------|------|--|
| SAK_1572* | hypothetical protein                                          | 0.15 |  |
| SAK_0728  | hypothetical protein                                          | 0.14 |  |
| SAK_0802  | hypothetical protein                                          | 0.14 |  |
| SAK_0803  | hypothetical protein                                          | 0.13 |  |
| SAK_0608* | hypothetical protein                                          | 0.09 |  |
| SAK_1130  | hypothetical protein                                          | 0.08 |  |
| SAK_0612* | hypothetical protein                                          | 0.08 |  |
| SAK_1131  | hypothetical protein                                          | 0.05 |  |
| SAK_0631* | hypothetical protein                                          | 0.04 |  |
| SAK_0641* | hypothetical protein                                          | 0.04 |  |
| SAK_0649* | hypothetical protein                                          | 0.04 |  |
| SAK_0630* | prophage LambdaSa03, HNH endonuclease family protein          | 0.04 |  |
| SAK_0629* | hypothetical protein                                          | 0.04 |  |
| SAK_0626* | hypothetical protein                                          | 0.04 |  |
| SAK_0643* | hypothetical protein                                          | 0.03 |  |
| SAK_0625* | hypothetical protein                                          | 0.03 |  |
| SAK_0634* | hypothetical protein                                          | 0.03 |  |
| SAK_0650* | hypothetical protein                                          | 0.03 |  |
| SAK_0642* | prophage LambdaSa03, structural protein, putative             | 0.02 |  |
| SAK_0611* | prophage LambdaSa03, transcriptional regulator, Cro/CI family | 0.02 |  |
| SAK_0639* | hypothetical protein                                          | 0.02 |  |
| SAK_0638* | hypothetical protein                                          | 0.02 |  |
| SAK_0644* | hypothetical protein                                          | 0.02 |  |
| SAK_0645* | prophage LambdaSa03, pblA protein, internal deletion          | 0.02 |  |
| SAK_0609* | hypothetical protein                                          | 0.02 |  |
| SAK_0615* | hypothetical protein                                          | 0.02 |  |
| SAK_0636* | hypothetical protein                                          | 0.02 |  |
| SAK_0621* | hypothetical protein                                          | 0.02 |  |
| SAK_0646* | prophage LambdaSa03, tail component, putative                 | 0.01 |  |
| SAK_0622* | hypothetical protein                                          | 0.01 |  |
| SAK_0640* | hypothetical protein                                          | 0.01 |  |
| SAK_0633* | hypothetical protein                                          | 0.01 |  |
| SAK_0648* | prophage LambdaSa03, minor structural protein, putative       | 0.01 |  |

|           |                                                                        |       |  |
|-----------|------------------------------------------------------------------------|-------|--|
| SAK_0614* | hypothetical protein                                                   | 0.01  |  |
| SAK_0620* | hypothetical protein                                                   | 0.01  |  |
| SAK_0619* | conserved hypothetical protein/bacteriophage resistance protein        | 0.01  |  |
| SAK_0610* | prophage LambdaSa03, transcriptional regulator, Cro/CI family          | 0.01  |  |
| SAK_0617* | prophage LambdaSa03, helicase, putative                                | 0.01  |  |
| SAK_0618* | hypothetical protein                                                   | 0.01  |  |
| SAK_0647* | prophage LambdaSa03, minor structural protein, putative                | 0.01  |  |
| SAK_0637* | prophage LambdaSa03, structural protein, putative                      | 0.01  |  |
| SAK_0635* | prophage LambdaSa03, terminase, large subunit, putative                | 0.01  |  |
| SAK_0607* | prophage LambdaSa03, site-specific recombinase, phage integrase family | 0.01  |  |
| SAK_0624* | hypothetical protein                                                   | 0.01  |  |
| SAK_0623* | hypothetical protein                                                   | 0.01  |  |
| SAK_0616* | conserved hypothetical protein TIGR01618                               | 0.01  |  |
| SAK_0632* | hypothetical protein                                                   | 0.004 |  |

\* indicates CovR regulated genes

**Table S3. S/T phosphopeptides that showed neutral loss of phosphoric acid during CID from GBS  $\Delta$ *stp1* and WT A909**

| <b>S/T peptides identified in <math>\Delta</math><i>stp1</i></b> | <b>Protein Accessions</b> | <b>Modifications</b> | <b>Protein Description</b>                                    | <b>Observed m/z</b> | <b>Mono m/z</b> | <b>MH+</b> | <b>Z</b> | <b><math>\Delta</math> score</b> |
|------------------------------------------------------------------|---------------------------|----------------------|---------------------------------------------------------------|---------------------|-----------------|------------|----------|----------------------------------|
| IAATDSVINtLSGQQAAQK                                              | SAK_0050                  | T10(Phospho)         | PcsB protein (pcsB)                                           | 984.9               | 1034.01         | 2067.01    | 2        | 0.06                             |
| FQAAAGQLEKtAR                                                    | SAK_0099                  | T11(Phospho)         | ribosomal protein L29 (rpmC)                                  | 686.93              | 735.86          | 1470.7     | 2        | 0.06                             |
| VNVNtEcQLAFcQATR                                                 | SAK_0178                  | T5(Phospho)          | fructose-1,6-bisphosphate aldolase, class II (fba) [4.1.2.13] | 947.33              | 995.93          | 1990.85    | 2        | 0.04                             |
| IYYtHSMYPGGLK                                                    | SAK_0276                  | T4(Phospho)          | ribosomal protein L13 (rplM)                                  | 756.41              | 805.35          | 1609.71    | 2        | 0.05                             |
| LDtEMIGLVK                                                       | SAK_0361                  | T3(Phospho)          | ATP-dependent RNA helicase, DEAD/DEAH box family              | 550.84              | 599.79          | 1198.5     | 2        | 0.03                             |
| NSGtAMYNQKPIAQSATNFDILK                                          | SAK_0373                  | T4(Phospho)          | DivIVA domain protein                                         | 832.89              | 864.74          | 2592.22    | 3        | 0.01                             |
| AGItEEDSILDK                                                     | SAK_0375                  | T4(Phospho)          | conserved hypothetical protein                                | 637.11              | 685.80          | 1370.61    | 2        | 0.07                             |
| SSDFANLDtASLDDFIK                                                | SAK_0375                  | T9(Phospho)          | conserved hypothetical protein                                | 921.25              | 969.92          | 1938.8     | 2        | 0.06                             |
| LVFNDTESiKTLPK                                                   | SAK_0389                  | T9(Phospho)          | serine/threonine protein kinase Stk1 (stk1)                   | 788.23              | 838.91          | 1672.8     | 2        | 0.06                             |
| VTSTVSSLtEQLLR                                                   | SAK_0389                  | T9(Phospho)          | serine/threonine protein kinase Stk1 (stk1)                   | 848.85              | 897.92          | 1794.83    | 2        | 0.09                             |
| sLNGIDPMDVIEK                                                    | SAK_0547                  | S1(Phospho)          | valyl-tRNA synthetase (valS)                                  | 735.80              | 784.35          | 1567.71    | 2        | 0.09                             |
| DNISRptEGELDSK                                                   | SAK_0581                  | T7(Phospho)          | cell division protein FtsZ (ftsZ)                             | 772.2               | 820.86          | 1640.7     | 2        | 0.08                             |
| KDKTNQVSGFtTSAPTNOAPSER                                          | SAK_0581                  | T11(Phospho)         | cell division protein FtsZ (ftsZ)                             | 816.34              | 848.73          | 2544       | 3        | 0.01                             |
| TGQEtSFDFDMK                                                     | SAK_0583                  | T5(Phospho)          | conserved hypothetical protein                                | 694.64              | 743.28          | 1485.56    | 2        | 0.08                             |
| ESLSQSVILAQEtAER                                                 | SAK_0586                  | T13(Phospho)         | cell division protein DivIVA, putative                        | 884.53              | 920.94          | 1840.87    | 2        | 0.05                             |
| QLEESGLLDtNNFQMEEPINLGETQTFK                                     | SAK_0586                  | T9(Phospho)          | cell division protein DivIVA                                  | 1070.73             | 1102.50         | 3305.50    | 3        | 0.08                             |
| LEtGDVALEDAlAEFQK                                                | SAK_0598                  | T3(Phospho)          | exodeoxyribonuclease VII, small subunit (xseB)                | 916.81              | 964.94          | 1928.88    | 2        | 0.03                             |
| LGKtEDDIIVNK                                                     | SAK_0651                  | T4(Phospho)          | conserved hypothetical protein                                | 664.19              | 712.85          | 1424.70    | 2        | 0.05                             |

|                       |          |              |                                                         |         |         |         |   |      |
|-----------------------|----------|--------------|---------------------------------------------------------|---------|---------|---------|---|------|
| AEEHtIALGQItEQIPAIVAK | SAK_0709 | T5(Phospho)  | septation ring formation regulator EzrA (ezrA)          | 766.16  | 798.05  | 2392.16 | 3 | 0.05 |
| VTHALDLYEtLQK         | SAK_0709 | T10(Phospho) | septation ring formation regulator EzrA (ezrA)          | 797.34  | 845.88  | 1690.75 | 2 | 0.08 |
| TsEVPVAEDDSFLELER     | SAK_0853 | S2(Phospho)  | signal recognition particle-docking protein FtsY (ftsY) | 959.89  | 1008.45 | 2015.89 | 2 | 0.00 |
| LTHLIsQNEVNDD         | SAK_0862 | S6(Phospho)  | HPr kinase/phosphorylase (hprK)                         | 740.35  | 789.34  | 1577.68 | 2 | 0.05 |
| APEtKVEDIVIDYK        | SAK_0865 | T4(Phospho)  | conserved hypothetical protein                          | 801.79  | 850.41  | 1699.82 | 2 | 0.04 |
| DKASEYsNLAVDTFK       | SAK_0865 | S7(Phospho)  | conserved hypothetical protein                          | 835.82  | 884.40  | 1767.79 | 2 | 0.08 |
| FESGELTtEDIVSAVK      | SAK_0865 | T8(Phospho)  | conserved hypothetical protein                          | 845.03  | 902.91  | 1804.83 | 2 | 0.02 |
| GKFESGELTTEDIVSAVK    | SAK_0865 | S5(Phospho)  | conserved hypothetical protein                          | 946.89  | 995.47  | 1989.94 | 2 | 0.04 |
| GLDtGFYDFDPSTVK       | SAK_0867 | T4(Phospho)  | peptidase, U32 (collagenase) family                     | 822.79  | 871.37  | 1741.74 | 2 | 0.06 |
| DTDKPLLLPVEDVFSItGR   | SAK_0887 | T17(Phospho) | translation elongation factor Tu (tuf)                  | 700.79  | 732.37  | 2195.10 | 3 | 0.05 |
| REEELSNAKtEANQIIDNAK  | SAK_0982 | T10(Phospho) | ATP synthase F0, B subunit (atpF)                       | 751.75  | 785.04  | 2353.10 | 3 | 0.09 |
| ELEAFtQFGSDLDAATQAK   | SAK_0984 | T6(Phospho)  | ATP synthase F1, alpha subunit (atpA)                   | 1013.43 | 1061.47 | 2121.94 | 2 | 0.02 |
| IGHtAYQVTQNSATEHAFTGK | SAK_1026 | T4(Phospho)  | methionine-R-sulfoxide reductase (msrB)                 | 748.72  | 781.02  | 2341.06 | 3 | 0.04 |
| EQPtQFGQGMSLQQALQAR   | SAK_1228 | T4(Phospho)  | ATP-dependent DNA helicase PcrA (pcrA)                  | 1050.93 | 1099.50 | 2198.00 | 2 | 0.05 |
| VSGQTILDQEtK          | SAK_1559 | T11(Phospho) | conserved hypothetical protein                          | 650.90  | 699.83  | 1398.85 | 2 | 0.03 |
| SSEFRtTENVPDIDLK      | SAK_1628 | T6(Phospho)  | conserved hypothetical protein TIGR00247                | 917.30  | 965.96  | 1930.88 | 2 | 0.01 |
| tAQLMADYEAQR          | SAK_1628 | T1(Phospho)  | conserved hypothetical protein TIGR00247                | 690.16  | 738.81  | 1476.62 | 2 | 0.02 |
| FSDQEtKEFASLSK        | SAK_1681 | T6(Phospho)  | glutamyl-tRNA(Gln) amidotransferase, C subunit (gatC)   | 843.76  | 892.39  | 1783.78 | 2 | 0.01 |
| MTtENLGEIVISPR        | SAK_1706 | T3(Phospho)  | conserved hypothetical protein                          | 771.37  | 820.39  | 1639.78 | 2 | 0.03 |
| NTEItRLYEQLK          | SAK_1774 | T5(Phospho)  | conserved hypothetical protein                          | 745.80  | 794.39  | 1587.78 | 2 | 0.07 |

|                                                  |                                  |                             |                                                            |                            |                        |                   |                 |                       |
|--------------------------------------------------|----------------------------------|-----------------------------|------------------------------------------------------------|----------------------------|------------------------|-------------------|-----------------|-----------------------|
| TILEEPIDEEAsRR                                   | SAK_1774                         | S13(Phospho)                | conserved hypothetical protein                             | 885.36                     | 933.92                 | 1866.85           | 2               | 0.05                  |
| sQMEATTSDFDREK                                   | SAK_2013                         | S1(Phospho)                 | chaperonin GroEL (groEL)                                   | 814.68                     | 862.84                 | 1724.68           | 2               | 0.01                  |
| LTAPSVQFDEtTGDYSR                                | SAK_2048                         | T11(Phospho)                | ribosomal protein L32 (rpmF)                               | 935.98                     | 983.92                 | 1966.84           | 2               | 0.05                  |
| IYYiHSMYPGGLK                                    | SAK_0276                         | T4(Phospho)                 | ribosomal protein L13 (rplM)                               | 756.41                     | 805.35                 | 1609.71           | 2               | 0.05                  |
| <b><u>S/T peptides identified in WT A909</u></b> | <b><u>Protein Accessions</u></b> | <b><u>Modifications</u></b> | <b><u>Protein Description</u></b>                          | <b><u>Observed m/z</u></b> | <b><u>Mono m/z</u></b> | <b><u>MH+</u></b> | <b><u>Z</u></b> | <b><u>Δ score</u></b> |
| sIWESQKEPIQEAITSFK                               | SAK_0186                         | S1(Phospho)                 | IgA-binding beta antigen (bag)                             | 702.42                     | 734.35                 | 2201.05           | 3               | 0.08                  |
| sLQDFIPLNEGK                                     | SAK_0270                         | S1(Phospho)                 | cysteinyI-tRNA synthetase (cysS)                           | 672.34                     | 720.84                 | 1440.68           | 2               | 0.01                  |
| VTSTVSSLtEQLLR                                   | SAK_0389                         | T10(Phospho)                | serine/threonine protein kinase Stk1 (stk1)                | 808.98                     | 857.93                 | 1714.86           | 2               | 0.06                  |
| sQFLQGSWNYER                                     | SAK_0433                         | S1(Phospho)                 | PTS system, IID component, mannose/fructose/sorbose family | 749.24                     | 797.83                 | 1594.66           | 2               | 0.09                  |
| sLQLLAQNYLHDR                                    | SAK_0483                         | S1(Phospho)                 | R3H domain protein                                         | 777.32                     | 825.90                 | 1650.80           | 2               | 0.01                  |
| sLGNGIDPMDVIEK                                   | SAK_0547                         | S1(Phospho)                 | valyl-tRNA synthetase (valS)                               | 735.37                     | 784.36                 | 1567.71           | 2               | 0.04                  |
| VLDEDDALPVVDDTESFDAtR                            | SAK_0586                         | T20(Phospho)                | cell division protein DivIVA, putative                     | 1271.01                    | 1303.23                | 3907.68           | 3               | 0.07                  |
| LTHLIsQNEVNDD                                    | SAK_0862                         | S6(Phospho)                 | HPr kinase/phosphorylase (hprK)                            | 740.35                     | 789.34                 | 1577.68           | 2               | 0.05                  |
| sFEGLYDLHNK                                      | SAK_0897                         | S1(Phospho)                 | peptide chain release factor 3 (prfC)                      | 653.15                     | 701.80                 | 1402.60           | 2               | 0.06                  |
| sFDFITK                                          | SAK_1544                         | S1(Phospho)                 | ribosomal protein L11 (rplK)                               | 420.49                     | 469.20                 | 937.40            | 2               | 0.05                  |
| VSGQTILDQEtK                                     | SAK_1559                         | T11(Phospho)                | conserved hypothetical protein                             | 650.90                     | 699.83                 | 1398.65           | 2               | 0.09                  |
| FSDQEtKEFASLSK                                   | SAK_1681                         | T6(Phospho)                 | glutamyl-tRNA(Gln) amidotransferase, C subunit (gatC)      | 843.76                     | 892.39                 | 1783.78           | 2               | 0.09                  |
| sVGGFVLGASHDATK                                  | SAK_2014                         | S1(Phospho)                 | chaperonin GroES (groES)                                   | 750.25                     | 798.87                 | 1596.74           | 2               | 0.02                  |

Phosphopeptide enrichment was performed as described previously ((11), also see *Experimental Procedures*). Phosphopeptides below showed neutral loss of phosphoric acid in the mass spectrometric (MS) analysis. The phosphorylated threonine or serine residue is indicated in small letter 't' or 's'. SAK numbers correspond to the ORF of the gene in the GBS A909 genome (12). The mass difference between observed m/z and mono m/z indicates the loss of phosphoric acid from double (49Da) or triple (~32.6Da) charged peptides.

**Table S4. Virulence of GBS lacking FtsZ, DivIVA, and DivIVA domain**

Moribund 50 (MD<sub>50</sub>) estimates and confidence intervals were calculated as described in the *Experimental Procedures*. *P* value compares the value of the mutant strain to the WT A909 (*P* value < 0.05 are considered significant).

| Strain                 | MD <sub>50</sub> (CFU) | 95% confidence interval                       | <i>P</i> value |
|------------------------|------------------------|-----------------------------------------------|----------------|
| A909 (WT)              | 1.5 X 10 <sup>4</sup>  | 2.1 X 10 <sup>3</sup> – 1.1 X 10 <sup>5</sup> | N/A            |
| Δ <i>ftsZ</i>          | 2.4 X 10 <sup>4</sup>  | 4.7 X 10 <sup>3</sup> – 1.2 X 10 <sup>5</sup> | 0.7            |
| Δ <i>divIVA</i>        | 1.9 X 10 <sup>5</sup>  | 2.8 X 10 <sup>4</sup> – 1.2 X 10 <sup>6</sup> | 0.09           |
| Δ <i>divIVA domain</i> | 2.6 X 10 <sup>5</sup>  | 3.9 X 10 <sup>4</sup> – 1.5 X 10 <sup>6</sup> | 0.06           |

## References

- Lamy, M. C., Zouine, M., Fert, J., Vergassola, M., Couve, E., Pellegrini, E., Glaser, P., Kunst, F., Msadek, T., Trieu-Cuot, P., and Poyart, C. (2004) *Mol. Microbiol.* **54**, 1250-1268
- Chaffin, D. O., Mentele, L. M., and Rubens, C. E. (2005) *J. Bacteriol.* **187**, 4615-4626
- Doran, K. S., Liu, G. Y., and Nizet, V. (2003) *J. Clin. Invest.* **112**, 736-744
- Doran, K. S., Engelson, E. J., Khosravi, A., Maisey, H. C., Fedtke, I., Equils, O., Michelsen, K. S., Arditi, M., Peschel, A., and Nizet, V. (2005) *J. Clin. Invest.* **115**, 2499-2507
- Rajagopal, L., Vo, A., Silvestroni, A., and Rubens, C. E. (2006) *Mol. Microbiol.* **62**, 941-957
- Madoff, L. C., Michel, J. L., Gong, E. W., Kling, D. E., and Kasper, D. L. (1996) *Proc. Natl. Acad. Sci. U. S. A.* **93**, 4131-4136
- Lin, W. J., Walthers, D., Connelly, J. E., Burnside, K., Jewell, K. A., Kenney, L. J., and Rajagopal, L. (2009) *Mol. Microbiol.* **71**, 1477-1495
- Rajagopal, L., Clancy, A., and Rubens, C. E. (2003) *J. Biol. Chem.* **278**, 14429-14441
- Wertman, K. F., Wyman, A. R., and Botstein, D. (1986) *Gene* **49**, 253-262
- Chaffin, D. O., and Rubens, C. E. (1998) *Gene* **219**, 91-99
- Burnside, K., Lembo, A., de Los Reyes, M., Iliuk, A., Binhtran, N. T., Connelly, J. E., Lin, W. J., Schmidt, B. Z., Richardson, A. R., Fang, F. C., Tao, W. A., and Rajagopal, L. (2010) *PLoS ONE* **5**, e11071
- Tettelin, H., Masignani, V., Cieslewicz, M. J., Donati, C., Medini, D., Ward, N. L., Angiuoli, S. V., Crabtree, J., Jones, A. L., Durkin, A. S., Deboy, R. T., Davidsen, T. M., Mora, M., Scarselli, M., Margarit y Ros, I., Peterson, J. D., Hauser, C. R., Sundaram, J. P., Nelson, W. C., Madupu, R., Brinkac, L. M., Dodson, R. J., Rosovitz, M. J., Sullivan, S. A., Daugherty, S. C., Haft, D. H., Selengut, J., Gwinn, M. L., Zhou, L., Zafar, N., Khouri, H., Radune, D., Dimitrov, G., Watkins, K., O'Connor, K. J., Smith, S., Utterback, T. R., White, O., Rubens, C. E., Grandi, G., Madoff, L. C., Kasper, D. L., Telford, J. L., Wessels, M. R., Rappuoli, R., and Fraser, C. M. (2005) *Proc. Natl. Acad. Sci. U. S. A.* **102**, 13950-13955
